# Supplementary material for: Was COVID‐19 Associated With Worsening Inequities in Stroke Treatment and Outcomes?
Source: PubMed Central journal article supplement — J Am Heart Assoc. 2023 Sep 26;12(19):e031221. doi: 10.1161/JAHA.123.031221 (PMC10727248; doi:10.1161/jaha.123.031221), 2023-09-26

# **SUPPLEMENTAL MATERIAL**

**Table S1. ICD-10-CM and ICD-10 PCS codes used to identify patient characteristics and treatment.**

|                                                                                |                                                            |
|--------------------------------------------------------------------------------|------------------------------------------------------------|
| Body mass index                                                                |                                                            |
| Underweight                                                                    | Z681                                                       |
| Morbid obesity                                                                 | Z684                                                       |
| NIH Stroke Scale                                                               |                                                            |
| NIHSS score 0-9                                                                | R2970                                                      |
| NIHSS score 10-19                                                              | R2971                                                      |
| NIHSS score 20-29                                                              | R2972                                                      |
| NIHSS score 30-39                                                              | R2973                                                      |
| NIHSS score 40-42                                                              | R2974                                                      |
| Stroke Location                                                                |                                                            |
| Precerebral artery - unspecified                                               | I6300; I6310; I6320                                        |
| Cerebral artery - unspecified                                                  | I6330; I6340; I6350                                        |
| Carotid artery                                                                 | I6303; I6313; I6323                                        |
| Anterior cerebral artery                                                       | I6332; I6342; I6352                                        |
| Middle cerebral artery                                                         | I6331; I6341; I6351                                        |
| Posterior cerebral artery                                                      | I6333; I6343; I6353                                        |
| Vertebral artery                                                               | I6301; I6311; I6321                                        |
| Cerebellar artery                                                              | I6334; I6344; I6354                                        |
| Basilar artery                                                                 | I6302; I6312; I6322                                        |
| Prior cardiac surgery or procedure                                             |                                                            |
| PCI                                                                            | Z955, Z9861                                                |
| CABG                                                                           | Z951                                                       |
| Heart valve surgery                                                            | Z95.2; Z95.3; Z95.4                                        |
| Functional status                                                              |                                                            |
| Wheel-chair                                                                    | Z993                                                       |
| Supplemental oxygen                                                            | Z9981                                                      |
| Dependent on provider                                                          | Z74                                                        |
| COVID-19                                                                       | U071                                                       |
| Dialysis                                                                       | Z992                                                       |
| Stroke Outcomes                                                                |                                                            |
| motor deficit (monoplegia, hemiplegia, other paralytic syndrome following CVA) | I6933; I6934; I6935; I6936; G81*;<br>G82; G833; G835; G838 |
| Endovascular thrombectomy                                                      | 03CG3ZZ                                                    |
| Thrombolytic therapy                                                           | 3E03                                                       |

**Table S2. 30-day Mortality.**

|                                       | Unadjusted        |       | Patient Characteristics |       | Patient and Hospital Characteristics |       |
|---------------------------------------|-------------------|-------|-------------------------|-------|--------------------------------------|-------|
|                                       | OR (95% CI)       | P     | OR (95% CI)             | P     | OR (95% CI)                          | P     |
| <b>Race</b>                           |                   |       |                         |       |                                      |       |
| Non-Hispanic White                    | reference         |       | reference               |       | reference                            |       |
| Non-Hispanic Black                    | 0.83 (0.8 ,0.85)  | 0.000 | 0.7 (0.69 ,0.72)        | 0.000 | 0.71 (0.69 ,0.72)                    | 0.000 |
| Hispanic                              | 0.95 (0.92 ,0.98) | 0.002 | 0.91 (0.88 ,0.95)       | 0.000 | 0.89 (0.87 ,0.92)                    | 0.000 |
| <b>Age</b>                            |                   |       |                         |       |                                      |       |
| 65-69                                 | reference         |       | reference               |       | reference                            |       |
| 70-74                                 | 1.07 (1.05 ,1.1)  | 0.000 | 1.16 (1.13 ,1.19)       | 0.000 | 1.16 (1.13 ,1.19)                    | 0.000 |
| 75-79                                 | 1.34 (1.31 ,1.37) | 0.000 | 1.41 (1.38 ,1.44)       | 0.000 | 1.41 (1.38 ,1.45)                    | 0.000 |
| 80-84                                 | 1.85 (1.81 ,1.89) | 0.000 | 1.92 (1.88 ,1.97)       | 0.000 | 1.93 (1.89 ,1.98)                    | 0.000 |
| 85-89                                 | 2.75 (2.69 ,2.81) | 0.000 | 2.82 (2.75 ,2.89)       | 0.000 | 2.85 (2.78 ,2.92)                    | 0.000 |
| 90-94                                 | 4.25 (4.15 ,4.35) | 0.000 | 4.32 (4.2 ,4.43)        | 0.000 | 4.39 (4.28 ,4.51)                    | 0.000 |
| 95-                                   | 6.76 (6.56 ,6.95) | 0.000 | 6.83 (6.6 ,7.06)        | 0.000 | 6.98 (6.76 ,7.22)                    | 0.000 |
| <b>Hospital Covid-19 burden</b>       |                   |       |                         |       |                                      |       |
| Before Covid-19                       | reference         |       | reference               |       | reference                            |       |
| 0.0-2.0%                              | 1.21 (1.15 ,1.27) | 0.00  | 1.2 (1.14 ,1.27)        | 0.000 | 1.2 (1.14 ,1.27)                     | 0.000 |
| 2.1-10.0%                             | 1.3 (1.22 ,1.37)  | 0.00  | 1.23 (1.15 ,1.32)       | 0.000 | 1.24 (1.16 ,1.32)                    | 0.000 |
| 10.1-20.0%                            | 1.36 (1.27 ,1.45) | 0.00  | 1.34 (1.25 ,1.45)       | 0.000 | 1.32 (1.23 ,1.43)                    | 0.000 |
| 20.1-30.0%                            | 1.32 (1.21 ,1.45) | 0.00  | 1.32 (1.19 ,1.46)       | 0.000 | 1.32 (1.2 ,1.46)                     | 0.000 |
| 30.1%-                                | 1.57 (1.41 ,1.75) | 0.00  | 1.51 (1.34 ,1.69)       | 0.000 | 1.52 (1.35 ,1.71)                    | 0.000 |
| <b>Sex</b>                            |                   |       |                         |       |                                      |       |
| Male                                  |                   |       | reference               |       | reference                            |       |
| Female                                |                   |       | 0.97 (0.96 ,0.98)       | 0.000 | 0.97 (0.96 ,0.98)                    | 0.000 |
| <b>Urgency</b>                        |                   |       |                         |       |                                      |       |
| Urgent                                |                   |       | 0.89 (0.86 ,0.92)       | 0.000 | 0.88 (0.86 ,0.91)                    | 0.000 |
| Emergent                              |                   |       | reference               |       | reference                            |       |
| <b>Admission source</b>               |                   |       |                         |       |                                      |       |
| Community                             |                   |       | reference               |       | reference                            |       |
| Hospital                              |                   |       | 1.37 (1.33 ,1.41)       | 0.000 | 1.41 (1.37 ,1.46)                    | 0.000 |
| SNF/Nursing Home                      |                   |       | 2.08 (2.01 ,2.15)       | 0.000 | 2.14 (2.07 ,2.22)                    | 0.000 |
| Other                                 |                   |       | 1.41 (1.34 ,1.5)        | 0.000 | 1.45 (1.37 ,1.53)                    | 0.000 |
| Dual-eligible                         |                   |       | 0.87 (0.86 ,0.89)       | 0.000 | 0.87 (0.85 ,0.88)                    | 0.000 |
| Medicare Advantage                    |                   |       | 0.98 (0.97 ,1)          | 0.000 | 1 (0.98 ,1.01)                       | 0.78  |
| <b>Body Mass Index</b>                |                   |       |                         |       |                                      |       |
| Underweight                           |                   |       | 2 (1.93 ,2.07)          | 0.000 | 2.01 (1.94 ,2.09)                    | 0.000 |
| Morbid obesity                        |                   |       | 0.89 (0.85 ,0.93)       | 0.000 | 0.89 (0.85 ,0.93)                    | 0.000 |
| <b>NIH Stroke Scale Score</b>         |                   |       |                         |       |                                      |       |
| 0-9                                   |                   |       | reference               |       | reference                            |       |
| 10-19                                 |                   |       | 4.17 (4.06 ,4.28)       | 0.000 | 4.16 (4.05 ,4.27)                    | 0.000 |
| 20-29                                 |                   |       | 12.5 (12 ,12.9)         | 0.000 | 12.5 (12 ,12.9)                      | 0.000 |
| 30-                                   |                   |       | 30.7 (28.6 ,32.9)       | 0.000 | 30.5 (28.5 ,32.7)                    | 0.000 |
| missing                               |                   |       | 2.93 (2.85 ,3.01)       | 0.000 | 2.87 (2.79 ,2.94)                    | 0.000 |
| <b>Time elapsed from prior stroke</b> |                   |       |                         |       |                                      |       |
| No prior stroke                       |                   |       | reference               |       | reference                            |       |
| <= 30 days                            |                   |       | 1.48 (1.43 ,1.54)       | 0.000 | 1.5 (1.44 ,1.55)                     | 0.000 |
| 31-60 days                            |                   |       | 1.38 (1.31 ,1.47)       | 0.000 | 1.39 (1.31 ,1.47)                    | 0.000 |
| 61-90 days                            |                   |       | 1.17 (1.09 ,1.27)       | 0.000 | 1.18 (1.09 ,1.27)                    | 0.000 |
| 91-180 days                           |                   |       | 1.09 (1.03 ,1.15)       | 0.003 | 1.09 (1.03 ,1.15)                    | 0.002 |
| 181-360 days                          |                   |       | 1.03 (0.99 ,1.08)       | 0.15  | 1.03 (0.99 ,1.08)                    | 0.15  |
| <b>Stroke location</b>                |                   |       |                         |       |                                      |       |
| Pre-cerebral, unspecified             |                   |       | 1.23 (1.13 ,1.33)       | 0.000 | 1.24 (1.14 ,1.34)                    | 0.000 |
| Cerebral, unspecified                 |                   |       | 1.11 (1.08 ,1.15)       | 0.000 | 1.13 (1.09 ,1.16)                    | 0.000 |
| Carotid                               |                   |       | 1.39 (1.34 ,1.44)       | 0.000 | 1.41 (1.36 ,1.46)                    | 0.000 |
| Anterior cerebral                     |                   |       | 1.34 (1.27 ,1.42)       | 0.000 | 1.36 (1.28 ,1.43)                    | 0.000 |
| Middle cerebral                       |                   |       | 2.13 (2.08 ,2.17)       | 0.000 | 2.17 (2.12 ,2.21)                    | 0.000 |
| Posterior                             |                   |       | 1.28 (1.24 ,1.33)       | 0.000 | 1.3 (1.26 ,1.35)                     | 0.000 |
| Vertebral                             |                   |       | 1.44 (1.35 ,1.54)       | 0.000 | 1.47 (1.38 ,1.57)                    | 0.000 |
| Cerebellar                            |                   |       | 1.38 (1.32 ,1.44)       | 0.000 | 1.4 (1.34 ,1.46)                     | 0.000 |
| Basilar                               |                   |       | 3.96 (3.75 ,4.18)       | 0.000 | 4.05 (3.84 ,4.27)                    | 0.000 |
| Other                                 |                   |       | reference               |       | reference                            |       |

|                                          | Unadjusted  |   | Patient Characteristics |       | Patient and Hospital Characteristics |       |
|------------------------------------------|-------------|---|-------------------------|-------|--------------------------------------|-------|
|                                          | OR (95% CI) | P | OR (95% CI)             | P     | OR (95% CI)                          | P     |
| <b>Prior procedures</b>                  |             |   |                         |       |                                      |       |
| PCI                                      |             |   | 0.76 (0.74 ,0.78)       | 0.000 | 0.76 (0.74 ,0.78)                    | 0.000 |
| CABG                                     |             |   | 0.98 (0.96 ,1.01)       | 0.17  | 0.98 (0.95 ,1)                       | 0.06  |
| Heart valve surgery                      |             |   | 0.81 (0.78 ,0.85)       | 0.000 | 0.83 (0.79 ,0.86)                    | 0.000 |
| <b>Functional Status</b>                 |             |   |                         |       |                                      |       |
| Wheel-chair                              |             |   | 1.56 (1.48 ,1.64)       | 0.000 | 1.58 (1.5 ,1.67)                     | 0.000 |
| Supplemental oxygen                      |             |   | 1.21 (1.16 ,1.27)       | 0.000 | 1.2 (1.15 ,1.26)                     | 0.000 |
| Dependent on provider                    |             |   | 2.14 (2 ,2.29)          | 0.000 | 2.11 (1.97 ,2.26)                    | 0.000 |
| Dialysis                                 |             |   | 2.46 (2.33 ,2.6)        | 0.000 | 2.47 (2.34 ,2.61)                    | 0.000 |
| COVID                                    |             |   | 1.95 (1.74 ,2.19)       | 0.000 | 1.96 (1.75 ,2.19)                    | 0.000 |
| <b>Elixhauser comorbidities</b>          |             |   |                         |       |                                      |       |
| Congestive heart failure                 |             |   | 1.5 (1.48 ,1.53)        | 0.000 | 1.51 (1.48 ,1.54)                    | 0.000 |
| Cardiac arrhythmias                      |             |   | 1.31 (1.29 ,1.33)       | 0.000 | 1.32 (1.3 ,1.34)                     | 0.000 |
| Valvular heart disease                   |             |   | 0.73 (0.72 ,0.75)       | 0.000 | 0.74 (0.72 ,0.76)                    | 0.000 |
| Pulmonary circulation                    |             |   | 1.17 (1.14 ,1.2)        | 0.000 | 1.17 (1.14 ,1.21)                    | 0.000 |
| Peripheral vascular disorder             |             |   | 0.96 (0.94 ,0.98)       | 0.000 | 0.97 (0.95 ,1)                       | 0.03  |
| Hypertension, uncomplicated              |             |   | 0.72 (0.7 ,0.74)        | 0.000 | 0.72 (0.71 ,0.74)                    | 0.000 |
| Hypertension, complicated                |             |   | 0.74 (0.72 ,0.76)       | 0.000 | 0.73 (0.71 ,0.76)                    | 0.000 |
| Chronic pulmonary disease                |             |   | 1.12 (1.1 ,1.14)        | 0.000 | 1.12 (1.1 ,1.14)                     | 0.000 |
| Diabetes, uncomplicated                  |             |   | 1.07 (1.05 ,1.09)       | 0.000 | 1.07 (1.05 ,1.09)                    | 0.000 |
| Diabetes, complicated                    |             |   | 1.09 (1.07 ,1.11)       | 0.000 | 1.09 (1.07 ,1.11)                    | 0.000 |
| Hypothyroidism                           |             |   | 0.89 (0.88 ,0.91)       | 0.000 | 0.89 (0.88 ,0.9)                     | 0.000 |
| Renal failure                            |             |   | 1.12 (1.09 ,1.14)       | 0.000 | 1.12 (1.1 ,1.15)                     | 0.000 |
| Liver disease                            |             |   | 1.51 (1.44 ,1.58)       | 0.000 | 1.52 (1.45 ,1.59)                    | 0.000 |
| Peptic ulcer disease                     |             |   | 0.89 (0.82 ,0.97)       | 0.005 | 0.89 (0.82 ,0.97)                    | 0.01  |
| AIDS/HIV                                 |             |   | 1.22 (0.93 ,1.59)       | 0.16  | 1.25 (0.95 ,1.63)                    | 0.11  |
| Lymphoma                                 |             |   | 1.32 (1.23 ,1.42)       | 0.000 | 1.34 (1.25 ,1.44)                    | 0.000 |
| Metastatic cancer                        |             |   | 3.99 (3.83 ,4.16)       | 0.000 | 4.06 (3.9 ,4.24)                     | 0.000 |
| Solid tumor                              |             |   | 1.92 (1.86 ,1.98)       | 0.000 | 1.93 (1.87 ,2)                       | 0.000 |
| Rheumatoid arthritis                     |             |   | 0.97 (0.93 ,1)          | 0.07  | 0.97 (0.94 ,1.01)                    | 0.14  |
| Coagulopathy                             |             |   | 1.41 (1.37 ,1.45)       | 0.000 | 1.43 (1.39 ,1.47)                    | 0.000 |
| Fluid and electrolyte disorder           |             |   | 1.62 (1.59 ,1.64)       | 0.000 | 1.61 (1.59 ,1.64)                    | 0.000 |
| Anemia, blood loss                       |             |   | 0.98 (0.9 ,1.08)        | 0.72  | 0.98 (0.9 ,1.08)                     | 0.72  |
| Anemia, deficiency                       |             |   | 0.91 (0.88 ,0.94)       | 0.000 | 0.91 (0.88 ,0.94)                    | 0.000 |
| Alcohol abuse                            |             |   | 0.99 (0.95 ,1.04)       | 0.75  | 1 (0.96 ,1.04)                       | 0.86  |
| Drug abuse                               |             |   | 0.9 (0.84 ,0.96)        | 0.002 | 0.9 (0.84 ,0.96)                     | 0.002 |
| Psychoses                                |             |   | 1.27 (1.18 ,1.36)       | 0.000 | 1.28 (1.19 ,1.37)                    | 0.000 |
| Depression                               |             |   | 0.89 (0.87 ,0.91)       | 0.000 | 0.9 (0.88 ,0.92)                     | 0.000 |
| <b>Volume of stroke hospitalizations</b> |             |   |                         |       |                                      |       |
| <50                                      |             |   |                         |       | reference                            |       |
| 50-249                                   |             |   |                         |       | 0.86 (0.79 ,0.95)                    | 0.002 |
| 250-749                                  |             |   |                         |       | 0.84 (0.76 ,0.92)                    | 0.000 |
| 750-                                     |             |   |                         |       | 0.84 (0.76 ,0.92)                    | 0.000 |

|                                                 | Unadjusted           |       | Patient Characteristics |       | Patient and Hospital Characteristics |       |
|-------------------------------------------------|----------------------|-------|-------------------------|-------|--------------------------------------|-------|
|                                                 | OR (95% CI)          | P     | OR (95% CI)             | P     | OR (95% CI)                          | P     |
| <b>Proportion of minority patients (stroke)</b> |                      |       |                         |       |                                      |       |
| <5%                                             |                      |       |                         |       | reference                            |       |
| 5.0-9.9%                                        |                      |       |                         |       | 0.98 (0.94 ,1.02)                    | 0.27  |
| 10.0-24.9                                       |                      |       |                         |       | 0.98 (0.94 ,1.02)                    | 0.22  |
| 25.0-49.9%                                      |                      |       |                         |       | 0.97 (0.93 ,1.02)                    | 0.26  |
| 50.0%-                                          |                      |       |                         |       | 0.94 (0.88 ,1)                       | 0.06  |
| <b>Disproportionate share percentage (DSH)</b>  |                      |       |                         |       |                                      |       |
| 0-9.9%                                          |                      |       |                         |       | reference                            |       |
| 10.0-24.9%                                      |                      |       |                         |       | 1.07 (1.01 ,1.13)                    | 0.02  |
| 25.0-49.9%                                      |                      |       |                         |       | 1.12 (1.06 ,1.18)                    | 0.000 |
| 50.0%-                                          |                      |       |                         |       | 1.24 (1.15 ,1.33)                    | 0.000 |
| <b>Resident-to-bed ratio</b>                    |                      |       |                         |       |                                      |       |
| 0                                               |                      |       |                         |       | reference                            |       |
| >0-0.10                                         |                      |       |                         |       | 0.97 (0.94 ,1)                       | 0.04  |
| 0.11-0.20                                       |                      |       |                         |       | 0.99 (0.95 ,1.04)                    | 0.76  |
| 0.21-0.40                                       |                      |       |                         |       | 0.94 (0.89 ,0.98)                    | 0.01  |
| 0.41-                                           |                      |       |                         |       | 0.93 (0.88 ,0.98)                    | 0.004 |
| <b>Rurality</b>                                 |                      |       |                         |       |                                      |       |
| Rural hospital                                  |                      |       |                         |       | reference                            |       |
| Large urban hospital                            |                      |       |                         |       | 0.82 (0.78 ,0.85)                    | 0.000 |
| Other urban hospital                            |                      |       |                         |       | 0.88 (0.85 ,0.92)                    | 0.000 |
| <b>Region</b>                                   |                      |       |                         |       |                                      |       |
| New England                                     |                      |       |                         |       | reference                            |       |
| Middle Atlantic                                 |                      |       |                         |       | 1.02 (0.96 ,1.08)                    | 0.48  |
| South Atlantic                                  |                      |       |                         |       | 1.13 (1.07 ,1.2)                     | 0.000 |
| East North Central                              |                      |       |                         |       | 1.06 (1.01 ,1.12)                    | 0.03  |
| East South Central                              |                      |       |                         |       | 1.24 (1.17 ,1.32)                    | 0.000 |
| West North Central                              |                      |       |                         |       | 1.02 (0.96 ,1.09)                    | 0.51  |
| West South Central                              |                      |       |                         |       | 1.14 (1.07 ,1.21)                    | 0.000 |
| Mountain                                        |                      |       |                         |       | 1.11 (1.04 ,1.18)                    | 0.001 |
| Pacific                                         |                      |       |                         |       | 1.03 (0.97 ,1.1)                     | 0.37  |
| Puerto Rico                                     |                      |       |                         |       | 1.56 (1.36 ,1.78)                    | 0.000 |
| Time                                            | 0.999 (0.998 ,0.999) | 0.000 | 0.999 (0.998 ,1)        | 0.01  | 0.999 (0.998 ,0.999)                 | 0.000 |
| <b>Admission month</b>                          |                      |       |                         |       |                                      |       |
| January                                         | reference            |       | reference               |       | reference                            |       |
| February                                        | 1 (0.97 ,1.02)       | 0.74  | 1 (0.97 ,1.03)          | 0.97  | 1 (0.97 ,1.03)                       | 0.94  |
| March                                           | 0.94 (0.91 ,0.97)    | 0.000 | 0.94 (0.91 ,0.97)       | 0.000 | 0.94 (0.91 ,0.97)                    | 0.000 |
| April                                           | 0.94 (0.91 ,0.97)    | 0.000 | 0.94 (0.91 ,0.97)       | 0.000 | 0.94 (0.91 ,0.97)                    | 0.000 |
| May                                             | 0.92 (0.89 ,0.95)    | 0.000 | 0.92 (0.89 ,0.95)       | 0.000 | 0.92 (0.89 ,0.95)                    | 0.000 |
| June                                            | 0.92 (0.89 ,0.94)    | 0.000 | 0.92 (0.89 ,0.94)       | 0.000 | 0.92 (0.89 ,0.95)                    | 0.000 |
| July                                            | 0.91 (0.88 ,0.93)    | 0.000 | 0.9 (0.87 ,0.93)        | 0.000 | 0.9 (0.87 ,0.93)                     | 0.000 |
| August                                          | 0.93 (0.9 ,0.96)     | 0.000 | 0.92 (0.89 ,0.95)       | 0.000 | 0.92 (0.89 ,0.95)                    | 0.000 |
| September                                       | 0.96 (0.93 ,0.99)    | 0.01  | 0.96 (0.93 ,0.99)       | 0.02  | 0.96 (0.93 ,0.99)                    | 0.02  |
| October                                         | 1.01 (0.98 ,1.04)    | 0.60  | 1.01 (0.97 ,1.04)       | 0.70  | 1.01 (0.98 ,1.04)                    | 0.62  |
| November                                        | 1.02 (0.99 ,1.05)    | 0.11  | 1.01 (0.98 ,1.05)       | 0.42  | 1.02 (0.98 ,1.05)                    | 0.36  |
| December                                        | 1.03 (0.99 ,1.06)    | 0.11  | 1.06 (1.03 ,1.1)        | 0.000 | 1.07 (1.03 ,1.1)                     | 0.000 |
| <b>COVID-19 month</b>                           |                      |       |                         |       |                                      |       |
| Before Covid-19                                 | reference            |       | reference               |       | reference                            |       |
| March-April                                     | 1 (0.93 ,1.07)       | 0.91  | 0.99 (0.92 ,1.06)       | 0.726 | 0.99 (0.92 ,1.06)                    | 0.74  |
| May                                             | 0.94 (0.88 ,1)       | 0.06  | 0.94 (0.87 ,1.01)       | 0.09  | 0.94 (0.87 ,1.01)                    | 0.10  |
| June                                            | 0.92 (0.86 ,0.98)    | 0.01  | 0.93 (0.87 ,1.01)       | 0.08  | 0.93 (0.87 ,1.01)                    | 0.07  |
| July                                            | 0.94 (0.87 ,1)       | 0.06  | 0.94 (0.87 ,1.01)       | 0.10  | 0.94 (0.87 ,1.01)                    | 0.11  |
| August                                          | 0.92 (0.86 ,0.99)    | 0.02  | 0.94 (0.87 ,1.01)       | 0.10  | 0.94 (0.87 ,1.01)                    | 0.11  |
| September                                       | 0.88 (0.83 ,0.95)    | 0.001 | 0.9 (0.83 ,0.97)        | 0.01  | 0.9 (0.84 ,0.97)                     | 0.01  |
| October                                         | 0.83 (0.78 ,0.89)    | 0.000 | 0.84 (0.78 ,0.91)       | 0.000 | 0.84 (0.78 ,0.91)                    | 0.000 |
| November                                        | 0.91 (0.85 ,0.98)    | 0.01  | 0.9 (0.84 ,0.98)        | 0.02  | 0.91 (0.84 ,0.99)                    | 0.02  |

Figure S1. Flow diagram describing the selection of cases in the analytic cohort.

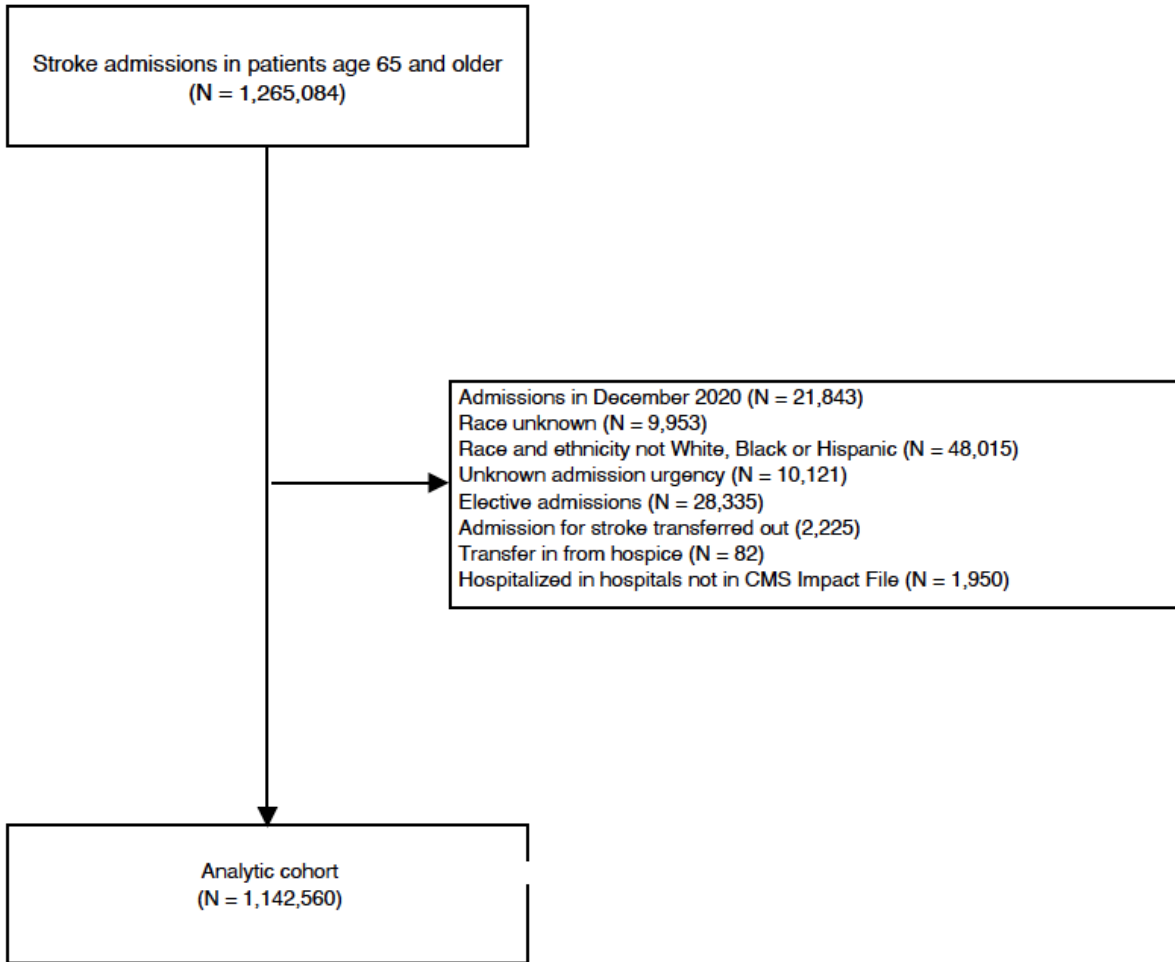

Supplement: JAH3-12-e031221-s001.pdf [file JAH3-12-e031221-s001.pdf]
